# 1      Quality and sustainability of Ethiopia's 2                      national surgical indicators

3  
4      Kayleigh R Cook<sup>1¶</sup>, Zebeay B Zeleke<sup>2¶</sup>, Ephrem Gebrehana<sup>3</sup>, Daniel Burssa<sup>4</sup>, Bantalem  
5      Yeshanew<sup>4</sup>, Atkilt Michael<sup>5</sup>, Yoseph Tediso<sup>5</sup>, Taylor Jaraczewski<sup>1</sup>, Chris Dodgion<sup>1</sup>, Andualem  
6      Beyene<sup>6&</sup>, Katherine R Iverson<sup>1&</sup>

7      <sup>1</sup> Department of Surgery, Medical College of Wisconsin, Milwaukee, WI, USA

8      <sup>2</sup>Department of Surgery, Bahir Dar University, Bahir Dar, Amhara Region, Ethiopia

9      <sup>3</sup> Department of Surgery, Hawassa University, Hawassa, Sidama Region, Ethiopia

10     <sup>4</sup> Ethiopian Ministry of Health, Addis Ababa, Ethiopia

11     <sup>5</sup>Sidama Regional Health Bureau, Hawassa, Sidama Region, Ethiopia

12     <sup>3</sup>Department of Surgery, Addis Ababa University, Addis Ababa, Ethiopia

13

14     \* Corresponding author

15     Email: [katie.r.iverson@gmail.com](mailto:katie.r.iverson@gmail.com) (KRI)

16

17     <sup>¶&</sup> These authors contributed equally to this work.

## 18 **Abstract**

19           In 2015, the Ethiopian Federal Ministry of Health (FMOH) developed the Saving Lives  
20 through Safe Surgery (SaLTS) initiative to improve national surgical care. Previous work led to  
21 development and implementation of 15 surgical key performance indicators (KPIs) to  
22 standardize surgical data practices. The objective of this project is to investigate current  
23 practices of KPI data collection and assess quality to improve data management and strengthen  
24 surgical systems.

25           The first portion of the study documented the surgical data collection process including  
26 methods, instruments, and effectiveness at 10 hospitals across 2 regions in Ethiopia. Secondly,  
27 data for KPIs of focus [1. Surgical Volume, 2. Perioperative Mortality Rate (POMR), 3. Adverse  
28 Anesthetic Outcome (AAO), 4. Surgical Site Infection (SSI), and 5. Safe Surgery Checklist  
29 (SSC) Utilization] were compared between registries, KPI reporting forms, and the DHIS2  
30 (district health information system) electronic database for a 6-month period (January - June  
31 2022). Quality was assessed based on data completeness and consistency.

32           The data collection process involved hospital staff recording data elements in registries,  
33 quality officers calculating KPIs, completing monthly KPI reporting forms, and submitting data  
34 into DHIS2 for the national and regional health bureaus. Data quality verifications revealed  
35 discrepancies in consistency at all hospitals, ranging from 1-3 indicators. For all hospitals,  
36 average monthly surgical volume was 57 cases, POMR was 0.38% (13/3399), inpatient SSI rate  
37 was 0.79% (27/3399), AAO rate was 0.15% (5/3399), and mean SSC utilization monthly was  
38 93% (100% median). Half of the hospitals had incomplete data within the registries, ranging  
39 from 2-5 indicators. AAO, SSC, and SSI were commonly missing data in registries. Non-  
40 standardized KPI reporting forms contributed significantly to the findings.

41 Facilitators to quality data collection included continued use of registries from previous  
42 interventions and use of a separate logbook to document specific KPIs. Delayed rollout of these  
43 indicators in each region contributed to issues in data quality. Barriers involved variable  
44 indicator recording from different personnel, data collection tools that generate false positives  
45 (i.e. completeness of SSC defined as paper form filled out prior to patient discharge) or missing  
46 data because of reporting time period (i.e. monthly SSI may miss infections outside of one  
47 month), inadequate data elements in registries, and lack of standardized monthly KPI reporting  
48 forms. As the FMOH introduces new indicators and changes, we recommend continuous and  
49 consistent quality checks and data capacity building, including the use of routinely generated  
50 health information for quality improvement projects at the department level.

## 51 **Introduction**

52 Creating effective global surgery programs requires a clear understanding of the  
53 baseline state of surgical care. While the global surgery movement has gained momentum in  
54 the past several years, there remains a lack of quality data regarding the status of surgery in  
55 low-resource settings [1]. Our understanding of surgical capacity, resources, and outcomes has  
56 been limited by our methods of inquiry and the system in place for measuring results.

57 The quest for global surgery data was instigated by the Lancet Commission on Global  
58 Surgery, [2] who proposed six core indicators designed to measure access to safe and  
59 affordable surgical care. A number of these were integrated into the World Bank's World  
60 Development Indicators [3] and the World Health Organization's Global Health Indicators [4].  
61 Based on expert opinion in the Utstein consensus report, the global surgery indicators have  
62 since been uniformly defined and narrowed to five (surgical volume, perioperative mortality rate  
63 (POMR), surgical workforce, financial risk protection, and geospatial access) [5]. Information on  
64 these metrics have come from a variety of methodological approaches in the global community.

65 Literature reviews, modeling studies, facility-based surveys, and regional and international  
66 surgical outcomes collaboratives are the diverse sources for these data [6-14]. While these  
67 studies have provided the foundation for global surgery indicator benchmarking, there is a  
68 growing need for sustainable and timely country-based systems with surgical metrics integrated  
69 into national health information systems [15-16].

70 A monitoring and evaluation pillar was included in Ethiopia's national surgical strategy  
71 (SaLTS or Saving Lives Through Safe Surgery) to gauge the current surgical practice in the  
72 country and create a sustainable method for tracking progress [17-18]. The surgical key  
73 performance indicators (KPIs) are 15 metrics prospectively collected and reported regularly from  
74 each health facility in the country. In 2018, the indicators were piloted at 10 hospitals across two  
75 regions of Ethiopia as part of Safe Surgery 2020, an initiative to improve surgical care in the  
76 country [19]. Since 2018, the electronic platform DHIS2 has been used to report and aggregate  
77 these indicators. Informed by the evaluation of the first five-year surgical strategic plan (SaLTS)  
78 in 2020, the Ethiopian Federal Ministry of Health has now initiated the second stage of this  
79 strategy, SaLTS II, in 2021. The SaLTS II plan [20] outlines the approach to meet surgical  
80 metric goals by the year 2025, that include increased surgical volume and providers in line with  
81 international standards, POMR < 2%, and improved access to care within two-hours. To  
82 evaluate the sustainability of the SaLTS data system and ensure its utility in monitoring progress  
83 towards these goals, this study was created to appraise these key surgical indicators.

84 The aim of this study is to investigate the data management practices and assess the  
85 quality of surgical data in Ethiopia by exploring how surgical indicators are collected and  
86 reported at the hospital level since their national implementation.

## 87 **Material and Methods**

### 88 **Study design**

89           The study was designed as a multi-institution, retrospective record review with hospital  
90 visits as the main source of program evaluation. A total of ten hospitals, split evenly between the  
91 Amhara and Sidama regions, were visited by the research team from July-August 2022. During  
92 hospital visits, surgical data practices were observed to assess the flow of information between  
93 hospital registries, hospital monthly key performance indicator (KPI) forms, and the District  
94 Health Information Software 2 (DHIS2) reports reviewed at the regional and national level. Data  
95 owners and instruments were identified at each step. The dates of record review ranged from  
96 1/1/2022 through 6/31/2022. The research team undertook a complete surgical data audit at  
97 each hospital visited. Registries within the OR, surgical ward, ICU, and maternity ward were  
98 reviewed by each reporting period and data points were aggregated to calculate monthly  
99 indicators. Researchers met with hospital quality improvement officers to audit monthly KPI  
100 reporting forms and final DHIS2 electronic database reports. At the Regional Health Bureaus,  
101 the final data reports from the queried hospitals visited were reviewed. At the national level, the  
102 DHIS2 conglomerate data from each Regional Health Bureau was evaluated. Data triangulation  
103 compared hospital to regional to national data.

### 104 **Subjects**

105           Primary and general public hospitals who were previously involved in Safe Surgery 2020  
106 interventions, with approval from the Amhara and Sidama Regional Health Bureau and the  
107 Ministry of Health, were selected for this research [19][21]. Amhara hospitals were further  
108 chosen based on their participation in the 2018 surgical data intervention carried out by the

109 research team. Sidama hospitals were selected according to their involvement in Safe Surgery  
110 2020 programming. Records of patients who underwent major surgery, defined as any  
111 procedure conducted in an operating room under general, spinal, or regional anesthesia [22],  
112 during their hospital stay within the study period were reviewed in this study.

## 113 **Methods of measurements**

114 Surgical Key Performance Indicators (KPIs) of interest were selected based on a prior  
115 surgical data intervention conducted at Amhara hospitals and on feedback from the Federal  
116 Ministry of Health (FMOH). The research team selected five indicators: Surgical Volume,  
117 Perioperative Mortality Rate (POMR), Rate of Safe Surgery Checklist Utilization (SSC), Surgical  
118 Site Infection Rate (SSI), and Anesthetic Adverse Outcome Rate (AAO) for data analysis.  
119 Formal definitions for each indicator were defined by the Saving Lives Through Safe Surgery  
120 (SALTS) program [22] and are included in Table 1. For collection of data from the registries, KPI  
121 reporting forms, and DHIS2 data, the investigators utilized Microsoft Excel forms at each  
122 hospital during on-site visits.

123 **Table 1. Five surgical key performance indicators of focus and definitions [23].**

| Indicator                                  | Definition                                                                                                                                                                                                                                               |
|--------------------------------------------|----------------------------------------------------------------------------------------------------------------------------------------------------------------------------------------------------------------------------------------------------------|
| Surgical Volume                            | The total number of major surgical procedures performed in an operating theater per 100,000 population per year.<br>Note: A major surgical procedure is defined as any procedure conducted in an OR under general, spinal, or major regional anesthesia. |
| Perioperative Mortality Rate (POMR)        | The all-cause death rate before discharge among patients who underwent a major surgical procedure in an operating theatre during the reporting period.<br>Note: Stratified by emergent and elective major procedures                                     |
| Rate of Safe Surgery Checklist Utilization | The proportion of surgical procedures where the safe surgery checklist was fully implemented.                                                                                                                                                            |
| Surgical Site Infection (SSI) Rate         | The proportion of all major surgeries with an infection occurring at the site of the surgical wound prior to discharge. One or more of the following criteria should be met:<br>Purulent drainage from the incision wound                                |

|                                        |                                                                                                                                                                                                                                                                                                                                                                                                                                                                                                                                                                                                                                                                                                                                                                                                                                                                                                                                                                                                       |
|----------------------------------------|-------------------------------------------------------------------------------------------------------------------------------------------------------------------------------------------------------------------------------------------------------------------------------------------------------------------------------------------------------------------------------------------------------------------------------------------------------------------------------------------------------------------------------------------------------------------------------------------------------------------------------------------------------------------------------------------------------------------------------------------------------------------------------------------------------------------------------------------------------------------------------------------------------------------------------------------------------------------------------------------------------|
|                                        | <p>Positive culture from a wound swab or aseptically aspirated fluid or tissue<br/>                 Spontaneous wound dehiscence or deliberate wound revision/opening by the surgeon in the presence of: pyrexia &gt; 38C or localized pain or tenderness<br/>                 Wound pain, tenderness, localized swelling, redness or heat AND incision opened by the surgeon or spontaneously dehisced</p> <p>Note: A major surgical procedure is defined as any procedure conducted in an OR under general, spinal, or major regional anesthesia.</p>                                                                                                                                                                                                                                                                                                                                                                                                                                               |
| <p>Anesthetic Adverse Outcome Rate</p> | <p>The percentage of surgical patients who developed any one of the following: (1) Cardiorespiratory arrest, (2) High spinal anesthesia, or (3) Inability to secure airway.</p> <p>Cardiorespiratory arrest defined as: cessation of cardiac activity as evidenced by:<br/>                 Chest compressions being performed<br/>                 Loss of femoral, carotid, and apical pulse with ECG changes</p> <p>High spinal defined as: within 15 minutes of administration of spinal anesthesia:<br/>                 Patient experiences loss of sensation in the shoulder AND<br/>                 Need for positive pressure ventilation after administration of spinal anesthesia<br/>                 Includes any administration of spinal anesthesia extending above T4 level.</p> <p>Inability to secure airway defined as:<br/>                 Having to awaken patient due to inability to intubate<br/>                 Cardiac-respiratory arrest due to failure to intubate</p> |

124 **Data analysis**

125 Enumerated data from hospital registries were compared with the data in the national  
 126 database. Analysis consisted of comparing data between sources (registry, KPI reporting forms,  
 127 and DHIS2) and assessing data quality according to dimension 1 (data completeness) and  
 128 dimension 2 (internal consistency of reported data) of the Data Quality Review (DQR)  
 129 framework [22]. Completeness of data was evaluated by reviewing the monthly KPI reporting  
 130 forms for the study period (Jan-June 2022) and documenting the number of months KPI data  
 131 was absent for each indicator. For example, if the value for surgical volume was missing for one  
 132 month at a single hospital, this was denoted as missing 1/6 of surgical volume data for the study

133 period. Inconsistent data was defined as the number of months within the six-month study  
134 period where the registry source data did not match the DHIS2 electronic database. Following  
135 FMOH guidelines, surgical indicator data was deemed inconsistent if DHIS2 data differed by  
136 more than 10% of the registry data. This established verification factor for routine data quality  
137 assessment is calculated by the number of recorded events from the source document (registry)  
138 divided by the number of reported events in the DHIS2 report, with verification factor greater  
139 than 1.1 (under-reporting) or less than 0.9 (over-reporting) deemed inconsistent [24]. The KPI  
140 Safe Surgery Checklist utilization was an exception where KPI reporting forms were used as the  
141 source data and matched to DHIS2 data, given this indicator is not recorded in the registry.

## 142 **Ethical approval**

143 Institutional review board approval was obtained from Medical College of Wisconsin and  
144 the Ethiopian Public Health Institute for all study activities. The study investigators also received  
145 a letter of support from the Federal Ministry of Health.

## 146 **Results**

### 147 **Hospital characteristics**

148 Table 2 includes hospital specific data on facility resources and characteristics for the  
149 ten study hospitals. Median catchment population was 375,000 patients (70,000-1,800,000)  
150 whereas median total hospital beds was 45 (25-145). Integrated Emergency Surgical Officers  
151 (IESOs), Master's-level health professionals intended to provide emergency and essential  
152 surgery in Ethiopia, were the predominant surgical provider at most institutions [25].

153 **Table 2. Hospital-specific characteristics.**



| Sidama Region                              |      |                |                |      |      | Amhara Region |      |      |      |      |
|--------------------------------------------|------|----------------|----------------|------|------|---------------|------|------|------|------|
|                                            | 1    | 2 <sup>a</sup> | 3 <sup>a</sup> | 4    | 5    | 6             | 7    | 8    | 9    | 10   |
| <b>Catchment Population</b>                | 100K | 800K           | 1.8M           | 178K | 400K | 170K          | 700K | 350K | 250K | 480K |
| <b>Operating Rooms</b>                     | 2    | 2              | 3              | 1    | 2    | 1             | 2    | 1    | 2    | 1    |
| <b>Personnel:</b>                          |      |                |                |      |      |               |      |      |      |      |
| <b>IESOs</b>                               | 0    | 2              | 5              | 2    | 1    | 4             | 3    | 4    | 4    | 4    |
| <b>Surgeons</b>                            | 1    | 1              | 5              | 1    | 1    | 1             | 0    | 1    | 1    | 0    |
| <b>Anesthetists/<br/>Anesthesiologists</b> | 2    | 5              | 6              | 3    | 3    | 4             | 4    | 4    | 5    | 2    |
| <b>OB/GYNs</b>                             | 0    | 2              | 3              | 0    | 0    | 1             | 0    | 0    | 1    | 0    |
| <b>GPs</b>                                 | 11   | 22             | 57             | 12   | 13   | 20            | 16   | 21   | 15   | 12   |
| <b>Beds:</b>                               |      |                |                |      |      |               |      |      |      |      |
| <b>Surgical</b>                            | 4    | 12             | 27             | 4    | 6    | 13            | 11   | 16   | 13   | 7    |
| <b>OB/GYN</b>                              | 6    | 17             | 23             | 4    | 12   | 7             | 5    | 8    | 6    | 7    |
| <b>Total in Hospital</b>                   | 34   | 110            | 145            | 25   | 36   | 50            | 47   | 92   | 43   | 38   |

154 Sidama Region (Hospitals 1-5), Amhara Region (Hospitals 6-10). IESOs = Integrated

155 Emergency Surgical Officers. OB = Obstetricians. GPs = General Practitioners. GYN =

156 Gynecology.

157 <sup>a</sup>General hospitals considered secondary level health care. All other hospitals are

158 primary hospitals, part of the primary level health care.

## 159 Data collection processes

160 At all ten hospitals, data flow mechanisms were observed and compiled into a

161 generalized process illustrated by Figure 1. The data collection process involved recording data

162 elements in registries by hospital staff, then calculation of KPIs by quality improvement (QI)

163 officers, completing monthly KPI reporting forms, and submitting data into the electronic national

164 data system (DHIS2). For the five KPIs evaluated, healthcare providers entered surgical data

165 into registries specific to their department, i.e. wards, ICU, or operating room. At the end of the

166 reporting period, the QI officers reviewed the registries and utilized the raw data to calculate key

167 performance indicators. If they noted any discrepancies or missing data, they would query the  
168 health provider responsible for that element. KPI data collection forms for this purpose varied  
169 between hospitals. The KPI data is then entered into the electronic DHIS2 and uploaded to the  
170 Regional Health Bureau (RHB) for approval. KPI data at the RHB is aggregated from multiple  
171 hospitals together to describe the surgical practice in the region and submitted to the Federal  
172 Ministry of Health.

173 **Figure 1. Surgical indicator data flow.** Responsible data owner and reporting instrument at  
174 each step of the data collection and reporting process. KPI = Key Performance Indicators,  
175 DHIS2 = District Health Information Software 2.

## 176 **Surgical key performance indicators**

177 From registry data collected independently, values for the five KPIs of interest were  
178 calculated for each month from January to June 2022 (Tir to Sene 2014 in the Ethiopian  
179 Calendar). For all ten hospitals over six-months, average monthly surgical volume was 57 cases  
180 and SSC utilization was 93% (Table 3). Over one month, the mean surgical volumes were 54  
181 and 59 cases per hospital in Amhara and Sidama, respectively. In Amhara, the majority of  
182 hospitals reflected the regional average. In Sidama, three primary hospitals performed less than  
183 15 cases each on average per month, while the two general hospitals each performed between  
184 55 and 214 operations on average per month. This extrapolates to a predicted rate of 50 to 712  
185 operations per 100,000 population annually at primary hospitals in Amhara, 30 to 67 per  
186 100,000 in Sidama primary hospitals, and 80 to 147 per 100,000 in Sidama general hospitals  
187 according to their determined catchment populations. When calculated using a standardized  
188 catchment population of 1 million for primary and general hospitals, there is a predictive rate of  
189 35 to 121 operations per 100,000 population annually at primary hospitals in Amhara, 4.8 to 12  
190 per 100,000 in Sidama primary hospitals, and 64 to 264 per 100,000 in Sidama general

191 hospitals. Across all ten hospitals over the 6-month period there were thirteen post-operative  
 192 mortality events, for a collective POMR of 0.38% (13/3399). For the same period, twenty-seven  
 193 surgical site infections were reported for an overall inpatient SSI rate of 0.79% (27/3399). Five  
 194 anesthetic adverse outcomes were documented for a collective AAO rate of 0.15% (5/3399).

195 **Table 3: Comparison of registries to DHIS2 data for surgical KPIs.**

| Median Surgical Volume  |                    |                    |                     | Median SSC             |                   |                     | Total SSI |       |                     | Total POMR |       |                     | Total AAO |       |                     |
|-------------------------|--------------------|--------------------|---------------------|------------------------|-------------------|---------------------|-----------|-------|---------------------|------------|-------|---------------------|-----------|-------|---------------------|
|                         | Registry           | DHIS2              | Inconsistent Months | KPI Forms <sup>a</sup> | DHIS2             | Inconsistent Months | Registry  | DHIS2 | Inconsistent Months | Registry   | DHIS2 | Inconsistent Months | Registry  | DHIS2 | Inconsistent Months |
| <b>Sidama Hospitals</b> |                    |                    |                     |                        |                   |                     |           |       |                     |            |       |                     |           |       |                     |
| 1                       | 4<br>(2-7)         | 1.5<br>(0-7)       | 50%                 | 56%<br>(4.4-100%)      | 56%<br>(4.4-100%) | 0%                  | 0         | 0     | 0%                  | 0          | 0     | 0%                  | 0         | 0     | 0%                  |
| 2                       | 55<br>(42-58)      | 63.5<br>(60-67)    | 100%                | 100%                   | 100%              | 0%                  | 0         | 0     | 0%                  | 2          | 1     | 17%                 | 0         | 0     | 0%                  |
| 3                       | 213.5<br>(204-245) | 215.5<br>(205-234) | 0%                  | 100%<br>(50-100%)      | 100%<br>(86-100%) | 33%                 | 3         | 3     | 33%                 | 11         | 0     | 83%                 | 0         | 0     | 0%                  |
| 4                       | 10<br>(6-14)       | 10<br>(6-16)       | 33%                 | 100%                   | 100%              | 0%                  | 0         | 1     | 17%                 | 0          | 0     | 0%                  | 0         | 0     | 0%                  |
| 5                       | 8.5<br>(5-18)      | 9<br>(6-18)        | 50%                 | 100% <sup>b</sup>      | 100%              | 0%                  | 3         | 0     | 50%                 | 0          | 0     | 0%                  | 0         | 0     | 0%                  |
| <b>Amhara Hospitals</b> |                    |                    |                     |                        |                   |                     |           |       |                     |            |       |                     |           |       |                     |
| 6                       | 97.5<br>(89-116)   | 99.5<br>(89-116)   | 100%                | 100%                   | 100%              | 0%                  | 14        | 8     | 50%                 | 0          | 0     | 0%                  | 0         | 0     | 0%                  |
| 7                       | 26.5<br>(18-49)    | 26.5<br>(18-49)    | 100%                | 100%                   | 100%              | 0%                  | 0         | 0     | 0%                  | 0          | 0     | 0%                  | 5         | 0     | 33%                 |
| 8                       | 52<br>(43-63)      | 52<br>(42-63)      | 100%                | 100%                   | 100%              | 0%                  | 3         | 0     | 33%                 | 0          | 0     | 0%                  | 0         | 0     | 0%                  |
| 9                       | 46.5<br>(30-79)    | 40.5<br>(28-53)    | 50%                 | 87.5%<br>(80-100%)     | 100%              | 67%                 | 3         | 1     | 50%                 | 1          | 0     | 17%                 | 0         | 0     | 0%                  |
| 10                      | 41<br>(27-50)      | 40.5<br>(28-51)    | 100%                | 100%                   | 100%              | 0%                  | 1         | 0     | 17%                 | 0          | 0     | 0%                  | 0         | 0     | 0%                  |

196 Surgical Volume, SSC = Surgical Safety Checklist utilization, SSI = Surgical Site Infection,  
 197 POMR = Perioperative Mortality Rate, AAO = Anesthesia Adverse Outcome. Median surgical  
 198 volume with range for each hospital across the 6-month study period documented within

199 hospital registries and DHIS2 report. Total surgery site infections, perioperative mortality events,  
200 and anesthesia adverse outcomes documented monthly in hospital registry and DHIS2 during  
201 the study period. \* <sup>a</sup>KPIs where monthly KPI forms were used as source data due to lack of  
202 registry data.

203 <sup>b</sup>Denotes that Hospital 5 SSC data was calculated from four months rather than six months as  
204 two months of KPI data were incomplete.

## 205 **Data quality**

206 Data quality was assessed based on two metrics: completeness and consistency. Our  
207 study found data completeness to be an average of 72% for the 10 hospitals, and 70% of  
208 hospitals had consistent data for the five surgical KPIs of interest. Verification factor calculations  
209 between registry and DHIS2 data, as seen in Figure 2, revealed inconsistencies (>10%  
210 difference) at nine total hospitals, commonly SSI (6/10) and surgical volume (5/10). Five  
211 hospitals demonstrated incomplete registry data, with the most commonly incomplete indicator  
212 data for AAO, SSC, and SSI. Across all five KPIs of interest, surgical volume was the most likely  
213 to be recorded within the registry and have inconsistencies between values recorded in the OR  
214 registry and DHIS2 (Table 3). Of note, Sidama hospitals frequently had more inconsistent  
215 surgical volume data than Amhara hospitals.

216

217 **Figure 2. Data quality assessment of five surgical indicators.** Number of hospitals out of 10  
218 with inconsistent (blue) and incomplete (orange) data for each KPI of focus for the 6-month  
219 period. SSC = Surgical Safety Checklist utilization, SSI = Surgical Site Infection, POMR =  
220 Perioperative Mortality Rate, AAO = Anesthesia Adverse Outcome.

221 After further investigation of inconsistencies between registry data and DHIS2 data,  
222 national data is revealing underreported rates (verification factor >1.1) for SSI, AAO, and POMR  
223 values. For POMR, 11 of the 13 events documented for all ten hospitals across 6-months were  
224 recorded at Hospital 3. However, this value does not correspond to the DHIS2 data which  
225 reported zero POMR events for Hospital 3 across the 6-months (Table 3). Furthermore, 1  
226 POMR event observed at Hospital 9 for the reporting period did not transfer to the DHIS2  
227 database but was present in the KPI reporting form. SSI rates were similarly underreported, with  
228 over half of the registry-documented surgical site infections at all ten hospitals over six months  
229 missing from the overall SSIs within DHIS2 (27/3399 vs 13/3399). For AAO, only Hospital 7  
230 recorded 5 AAO events within their registry for the six-month period, but zero AAO events were  
231 present within DHIS2 for all ten hospitals over the study period. SSC data was mostly consistent  
232 between KPI forms and DHIS2 data, with the exception of Hospital 9 where median SSC  
233 differed by 12.5% and Hospital 3 where the range of SSC values differed by 36% but the  
234 median remained the same.

## 235 Discussion

236 This study evaluated the process and quality of current surgical data practices in  
237 Ethiopia through five key performance indicators (KPIs) at ten hospitals in two regions over a 6-  
238 month period. The evaluation occurs five years after the creation and implementation of the  
239 surgical KPI data system in conjunction with Ethiopia's national strategic plan (SaLTS) to  
240 improve surgical and anesthesia care.

241 Principle findings include a largely uniform mechanism for data collection and reporting  
242 between facilities from hospital registries, to data collection forms, to the DHIS2 electronic  
243 database. However, the lack of standardization of data collection forms and staff practices  
244 between each hospital may be a source of discrepancies in comparing outcomes from registries

245 to DHIS2 data. Data quality was assessed based on two metrics: completeness and  
246 consistency which were found to be above 70% for the five KPIs at all 10 hospitals. Our study  
247 found data completeness was 72% on average for the 10 hospitals, and 70% of hospitals had  
248 consistent data for the five surgical KPIs of interest.

249 Data quality varied based on the specific indicator. Surgical volume was largely  
250 complete throughout the data process. At least 3 out of 10 hospitals had incomplete data for  
251 SSI, SSC, and AAO. This is likely due to difficulty with defining and tracking the perioperative  
252 complications of surgical site infection and anesthesia adverse outcomes, as there was  
253 observed to be variation in registries and forms for recording these two indicators, mechanisms  
254 for reporting these outcomes across the data flow, and inconsistency in which hospital provider  
255 was responsible this data collection.

256 Most inconsistencies are found for SSIs and surgical volume, with at least half of  
257 hospitals having inconsistent data for these two indicators. Some hospitals were not using  
258 standard registries, which could lead to missed data elements. For example, SSIs were highest  
259 in hospital 6 (n=14), but only a little over half of these events made it into DHIS2 (n=8). The  
260 initial data intervention included a SSI registry as part of the suite of tools for collecting and  
261 recording the indicators. Some hospitals had this SSI logbook to better capture this data, but  
262 there was variability in use of this system as opposed to using the hospital ward registries for  
263 recording infections.

264 The lack of or non-standardized data collection tools to transfer indicator components  
265 from the registries to DHIS2 also created a major gap in the link between these metrics. For  
266 example, Hospital 3 had the highest POMR (11 deaths) according to the registry data, but this  
267 was not accounted for in DHIS2 (0 deaths). We observed difficulty in accounting for surgical  
268 deaths from multiple different departments (ICU, multiple wards, and OR) which could explain

269 this disparity, as deaths from the ICU were left out of the data process for POMR at this  
270 hospital. It also demonstrates the need for specifically trained personnel for data collection and  
271 entry, as well as routine data quality checks. Apart from the different areas of data management  
272 shortcomings due to lack of appropriate tools, there could be a high turnover of the already  
273 trained quality improvement officers. There should also be a uniform understanding of the  
274 primary data owners and the QI officers.

275 There were overall relatively low rates of complications such as SSI (0.79%), AAO  
276 (0.15%), and POMR (0.38%). It is possible that the data does not capture the full reality as  
277 outcomes are limited to inpatient events. Additionally, many of the hospitals, especially primary  
278 hospitals in Sidama, had lower surgical volume and cases were limited to cesarean-sections,  
279 which likely contributes to the lack of significant complications in these settings.

## 280 **Surgical Site Infection**

281 For SSI, our study estimated a value of 0.79% (27/3399) across 10 hospitals, lower than  
282 the 2% value recorded by the Network for Perioperative and Critical Care (N4PCC) 2021  
283 registry [26] and the 10.2% described in the African Surgical Outcomes Study [11]. Specifically  
284 for SSI, patients are often discharged before they will develop signs and symptoms of infection.  
285 There is currently no uniform mechanism to enumerate outpatient SSIs.

## 286 **Anesthesia Adverse Outcome**

287 Similarly for AAO, our dataset of 3399 surgeries yielded only 5 AAO events for a rate of  
288 0.15%. This is considerably lower than the N4PCC 2021 registry value of 3.1% [26] and closer  
289 to the AAO reported value of 0.94% in Zimbabwe [27]. The use of a multicenter cloud-based  
290 registry, in-hospital coordinators and data trainers, and utilization of an offline mobile application

291 for data collection most likely improved reporting compliance and identification of adverse  
292 events, leading to increased AAO capture rates in the N4PCC study [26]. Variation in AAO rates  
293 reported can also be attributed to variations in KPI definitions, as in Zimbabwe where an AAO is  
294 defined as a critical incident and includes nausea or post-operative pain [27]. Furthermore for  
295 AAO, it may be difficult to detect and diagnose complications such as high spinal anesthesia.  
296 This was also the indicator with the greatest variability in recording mechanisms and data  
297 ownership, likely accounting for the very low AAO, with only one hospital reporting these events.  
298 Additional training for knowledge and skills may be needed in this case.

## 299 **Peri-Operative Mortality Rate**

300 Our study found a lower POMR at 0.38% (13/3399) than the 0.9% (9/1000) found in the  
301 N4PCC 2021 registry surveyed at 4 Ethiopian hospitals [26]. This disparity may be due to the  
302 indicators being limited to only inpatient events, thus POMR may be lower than expected as  
303 deaths for KPIs are registered only before discharge. There were also some deaths recorded in  
304 registries, which were not reported in the national data as mentioned previously. Further  
305 external audits for these complications including chart reviews and periodical follow-up surveys  
306 are recommended to understand the true state of surgical outcomes in Ethiopian hospitals.

## 307 **Surgical Volume**

308 Calculated annual surgical volume for Sidama general hospitals is 80 to 147 operations  
309 per 100,000, 50 to 712 operations per 100,000 population at primary hospitals in Amhara, and  
310 30 to 67 per 100,000 in Sidama primary hospitals. In our dataset, surgical volume at all ten  
311 hospitals has not yet reached the LCoGS 2030 target of 5000 surgeries per 100,000 population  
312 annually [2]. Study findings of surgical volume for Sidama general hospitals (Jan- June 2022)  
313 are consistent with Meshesha *et al.*'s surgical volume of 289 per 100,000 over a 90-day interval



314 (Sept 2020 - May 2021) for general hospitals [28]. Our study calculates higher annual surgical  
315 volumes for Amhara and Sidama primary hospitals than the 37 per 100,000 found for primary  
316 health care units over a 90-day interval. The Amhara primary hospitals showed an overall  
317 increase in their surgical volume compared to the previous study during the data intervention in  
318 2018, [30] which may be due to both growth in surgical capacity and population needs.

## 319 **Surgical Safety Checklist**

320 Estimated SSC values were 93% for 3399 surgeries, consistent with the 92.1% found in  
321 the N4PCC registry for 1595 surgical cases [26] and higher than the 67.6% rate reported by  
322 Sibhatu *et. al.* 2022 [29]. Our study determined 60% of audited hospitals had complete SSC  
323 data, consistent with the 60.8% of 659 checklists the latter study found to be filled completely  
324 and correctly. The barriers to data collection identified at ten hospitals within the Amhara and  
325 Sidama region are consistent with the findings of previous investigations into data quality within  
326 the Ethiopian healthcare system. The overreporting of certain surgical KPIs, namely SSC and  
327 underreporting metrics of illness or mortality was concurrent with findings from Mekebo *et. al.*  
328 and other studies [30-32]. Our observation of data flow processes demonstrated that SSC  
329 values are calculated by QI officers by selecting a sample of ten patient charts for review. At  
330 certain institutions, stop-gap mechanisms were implemented to prevent the progression of  
331 patient charts to the Inpatient Admission office (IPAD) until all forms including the SSC were  
332 completed. Such processes might explain the disparity Sibhatu *et. al* found between the DHIS2  
333 SSC value of 81% and the externally audited 60.8% retrospectively calculated from patient  
334 charts [28]. High rates of surgical data inconsistency were a major result of this research and  
335 are likely due to lack of consistent KPI reporting forms, and the considerable burden of  
336 aggregating substantive data elements into complex indicators as discussed previously by  
337 Adane *et al* 2020 [33]. Our observations were in alignment with other challenges with data

338 collection in an Ethiopian setting previously discussed including turnover of hospital staff, poor  
339 understanding of data processes, modification or manipulation of data to compensate for the  
340 lack of data, and technological issues with DHIS2 [30-31].

## 341 **Limitations**

342 National implications of this study are limited by the small sample size (10 hospitals) and  
343 limited study period (six months). Follow-up investigation using qualitative methods will provide  
344 further context around the findings. Additionally, the use of registry data as primary source data  
345 generates the risk that some surgical indicators not recorded in the registry were left out of our  
346 analysis. Using registry data rather than performing a retrospective review of surgical patient  
347 charts could underestimate issues with data quality. Mortality audits, or complication audits, are  
348 another potential mechanism to capture more complete data for these outcomes [34-35].  
349 Another source of data quality inconsistency could be attributed to reporting period variability  
350 between hospitals. This study utilized DHIS2 reporting periods for data auditing. Other  
351 limitations include the inability to quantitatively assess the level of data correction and  
352 manipulation by hospital staff following recording in the registry and prior to DHIS2 input.  
353 Concern over the consequences of reporting values too high or low for a given indicator likely  
354 compound this issue. The study team noted blank entries were often used to denote “0” findings  
355 within data forms, challenging the ability to assess data completeness. Finally, this study was  
356 unable to include hospitals involved in previous data quality interventions in Tigray because of  
357 ongoing conflict and travel restrictions.

## 358 **Recommendations**

359 Our study recommends a regular supervision mechanism focused on identifying and  
360 addressing data inconsistencies. At the national level, an emphasis on the importance of data

361 quality while simultaneously ensuring no penalty for suboptimal outcomes is imperative. The  
362 study team similarly recommends at the regional level, the implementation of permanent survey  
363 teams to decrease the risk of errors and improve data quality and utilization. This system is  
364 currently in place in some regions, and initial feedback from this study has been used for this  
365 purpose. At the hospital level, more consistent quality improvement programs to emphasize the  
366 relevance of these indicators can provide an opportunity to focus on surgical complications as  
367 areas for better teamwork, while increasing data capture as a byproduct.

## 368 **Conclusion**

369 This study demonstrates the ongoing challenges to accurate surgical data collection in a  
370 resource-limited setting. Five years after the implementation of Ethiopia's surgical indicators as  
371 part of their national surgical and anesthesia strategic plan, there remains difficulty with  
372 capturing the true value of surgical complications such as infections and perioperative mortality.  
373 While a national system for data collection and reporting was established and is imperative to  
374 ongoing progress, more unified mechanisms for data transfer, ongoing training for quality  
375 officers and health professionals, as well as regular audits for data consistency are needed to  
376 improve the current structure. Capturing outpatient surgical outcomes as well as the  
377 development of an electronic registry, which is currently in development, will lead to  
378 improvements in continuing to track surgical capacity and quality in Ethiopia [21][26].

## 379 **Acknowledgments**

380 We thank the Ethiopian Federal Ministry of Health, Sidama Regional Health Bureau, and  
381 Amhara Regional Health Bureau for their support and collaboration.

382

## 383 **References**

- 384 [1] German Global Surgery Association, Harvard Medical School Program in Global Surgery  
385 and Social Change. Global Surgery and Anaesthesia Statistics: The Importance of Data  
386 Collection. The G4 Alliance; 2018. Accessed 29 September 2021. Available from:  
387 [https://gallery.mailchimp.com/dd9db680c07f4e88485196260/files/01801d8f-f374-4b14-9404-](https://gallery.mailchimp.com/dd9db680c07f4e88485196260/files/01801d8f-f374-4b14-9404-fcd532ca06a9/Surgical_AnaesthesiaDataReport.pdf)  
388 [fcd532ca06a9/Surgical\\_AnaesthesiaDataReport.pdf](https://gallery.mailchimp.com/dd9db680c07f4e88485196260/files/01801d8f-f374-4b14-9404-fcd532ca06a9/Surgical_AnaesthesiaDataReport.pdf).
- 389 [2] Meara JG, Leather AJM, Hagander L, Alkire BC, Alonso N, Ameh EA, et al. Global Surgery  
390 2030: evidence and solutions for achieving health, welfare, and economic development.  
391 International Journal of Obstetric Anesthesia. 2016 Feb; 25:75–8.
- 392 [3] The World Bank. World Development Indicators 2019. Available from:  
393 <http://data.worldbank.org>.
- 394 [4] WHO. Global Reference List of 100 Core Health Indicators (plus health-related SDGs).  
395 Geneva: WHO; 2018. Available from: <https://apps.who.int/iris/handle/10665/259951>
- 396 [5] Davies J, Gelb AW, Gore-Booth J, Martin J, Jannicke Mellin-Olsen, Åkerman C, et al. Global  
397 surgery, obstetric, and anaesthesia indicator definitions and reporting: An Utstein consensus  
398 report. PLOS Medicine. 2021 Aug 20;18(8): e1003749–9.
- 399 [6] Juran S, Gruendl M, Marks IH, P. Niclas Broer, José Luis Guzmán, Davies JE, et al. The  
400 need to collect, aggregate, and analyze global anesthesia and surgery data. Can J Anesth.  
401 2019 Feb 1;66(2):218–29.
- 402 [7] Holmer H, Bekele A, Hagander L, Harrison EM, Kamali P, Ng-Kamstra JS, et al. Evaluating  
403 the collection, comparability and findings of six global surgery indicators. British Journal of  
404 Surgery. 2018 Dec 20;106(2): e138–50.

- 405 [8] Marks I, Kamali P, Khan M. Data for the sustainable development of surgical systems: a  
406 global collaboration. WDI surgical indicators data collection. 2016.
- 407 [9] JEF Fitzgerald, C Khatri, JC Glasbey, M Mohan, R Lilford, E M Harrison, et al. GlobalSurg  
408 Collaborative. Mortality of emergency abdominal surgery in high-, middle- and low-income  
409 countries [published correction appears in Br J Surg. 2017 Apr;104(5):632]. Br J Surg.  
410 2016;103(8):971-988. doi:10.1002/bjs.10151
- 411 [10] Bhangu A, Ademuyiwa AO, Aguilera ML, Alexander P, Al-Saqqa SW, Borda-Luque G, et al.  
412 GlobalSurg Collective. Surgical site infection after gastrointestinal surgery in high-income,  
413 middle-income, and low-income countries: a prospective, international, multicentre cohort study.  
414 The Lancet Infectious Diseases. 2018 May;18(5):516–25.
- 415 [11] Biccard BM, Madiba TE, Kluyts HL, Munlemvo DM, Madzimbamuto FD, Basenero A, et al.  
416 Perioperative patient outcomes in the African Surgical Outcomes Study: a 7-day prospective  
417 observational cohort study. The Lancet. 2018 Apr;391(10130):1589–98.
- 418 [12] Guest GD, McLeod E, Perry WRG, Tangi V, Pedro J, Ponifasio P, et al. Collecting data for  
419 global surgical indicators: a collaborative approach in the Pacific Region. BMJ Global Health.  
420 2017 Nov;2(4): e000376.
- 421 [13] Peck G, Roa L, Barthlemy EJ, South S, Foianini JE, Ferreira RV, et al. Improving global  
422 emergency and essential surgical care in Latin America and the Caribbean: A collaborative  
423 approach. Bull Am Coll Surg. 2019;104(3):24-39.
- 424 [14] Zadey S, Iyer H, Nayan A, Shetty R, Sonal S, Smith ER, et al. Evaluating the status of the  
425 Lancet Commission on Global Surgery indicators for India. The Lancet Regional Health -  
426 Southeast Asia [Internet]. 2023 Jun 1 [cited 2023 Jul 7]; 13:100178. Available from:  
427 <https://www.sciencedirect.com/science/article/pii/S2772368223000380?via%3Dihub>

- 428 [15] UNITAR. National Surgical, Obstetric and Anaesthesia Planning Manual. Edition 2020.  
429 Geneva, Switzerland: United Nations Institute for Training and Research (UNITAR). DOI:  
430 10.5281/zenodo.3982869
- 431 [16] Sonderman KA, Citron I, Mukhopadhyay S, Albutt K, Taylor K, Jumbam D, et al. Framework  
432 for developing a national surgical, obstetric and anaesthesia plan. BJS Open. 2019 Jul  
433 24;3(5):722–32.
- 434 [17] Burssa D, Teshome A, Iverson K, Ahearn O, Ashengo T, Barash D, et al. Safe Surgery for  
435 All: Early Lessons from Implementing a National Government-Driven Surgical Plan in Ethiopia.  
436 World Journal of Surgery. 2017 Oct 13;41(12):3038–45.
- 437 [18] Iverson KR, Ahearn O, Citron I, Garringer K, Mukhodpadhyay S, Teshome A, et al.  
438 Development of a surgical assessment tool for national policy monitoring & evaluation in  
439 Ethiopia: A quality improvement study. International Journal of Surgery. 2020 Aug; 80:231–40.
- 440 [19] Iverson KR, Drown L, Bari S, Abate M, Burssa D, Garringer K, et al. Surgical key  
441 performance indicators in Ethiopia’s national health information system: Answering the call for  
442 global surgery data. East Cent Afr J Surg. 2021;26(3):92-103.
- 443 [20] Ministry of Health, Health Service Quality Directorate (HSQD)(Ethiopia). 2021. National  
444 Surgical Care Strategic Plan: Saving Lives Through Safe Surgery II (SaLTS II, 2021-2025).  
445 Addis Ababa, Ethiopia. Available from:  
446 [http://repository.iifphc.org/bitstream/handle/123456789/1685/National-Surgical-Care-Strategic-](http://repository.iifphc.org/bitstream/handle/123456789/1685/National-Surgical-Care-Strategic-Plan.pdf?sequence=1&isAllowed=y)  
447 [Plan.pdf?sequence=1&isAllowed=y](http://repository.iifphc.org/bitstream/handle/123456789/1685/National-Surgical-Care-Strategic-Plan.pdf?sequence=1&isAllowed=y)
- 448 [21] Fitsum Kifle Belachew, Tewodros Kifleyohanes, Moore J, Teshome A, Biccadd B.  
449 Indications, Challenges, and Characteristics of Successful Implementation of Perioperative

450 Registries in Low Resource Settings: A Systematic Review. *World Journal of Surgery*. 2023 Jan  
451 19;47(6):1387–96.

452

453 [22] World Health Organization. Data quality review: module 1: framework and metrics [Internet].  
454 apps.who.int. World Health Organization; 2017 [cited 2022 Aug 11]. Available from:  
455 <https://apps.who.int/iris/handle/10665/259224>

456 [23] Iverson KR, Drown L, Bari S, Abate M, Burssa D, Garringer K, et al. Surgical key  
457 performance indicators in Ethiopia’s national health information system: Answering the call for  
458 global surgery data. *East Cent Afr J Surg*. 2021;26(3):92-103. Table 1, SaLTS key performance  
459 indicators; p. 94.

460 [24] Routine Data Quality Assessment Tool: User Manual [Internet]. Measureevaluation.org  
461 2017 [cited 2023 Sep 27]. Available from:  
462 [https://www.measureevaluation.org/resources/publications/ms-17-117/at\\_download/document](https://www.measureevaluation.org/resources/publications/ms-17-117/at_download/document)

463 [25] Integrated Emergency Surgical Officers | MINISTRY OF HEALTH - Ethiopia [Internet].  
464 www.moh.gov.et. [cited 2023 Jan 19]. Available from: [https://www.moh.gov.et/site/initiatives-4-](https://www.moh.gov.et/site/initiatives-4-col/Integrated-Emergency-Surgical-Officers)  
465 [col/Integrated-Emergency-Surgical-Officers](https://www.moh.gov.et/site/initiatives-4-col/Integrated-Emergency-Surgical-Officers)

466 [26] Network for Peri-operative Critical care (N4PCc) \*. Addressing priorities for surgical  
467 research in Africa: implementation of a multicentre cloud-based peri-operative registry in  
468 Ethiopia. *Anaesthesia*. 2021;76(7):933-939.

469 [27] Madzimbamuto FD, Chiware R. A critical incident reporting system in anaesthesia. *Cent Afr*  
470 *J Med*. 2001;47(11-12):243-247.

- 471 [28] Meshesha BR, Sibhatu MK, Beshir HM, Zewude WC, Taye DB, Getachew EM, et al.  
472 Access to surgical care in Ethiopia: a cross-sectional retrospective data review. *BMC Health*  
473 *Services Research*. 2022 Jul 30;22(1).
- 474 [29] Sibhatu MK, Taye DB, Gebreegziabher SB, Mesfin E, Bashir HM, Varallo J. Compliance  
475 with the World Health Organization's surgical safety checklist and related postoperative  
476 outcomes: a nationwide survey among 172 health facilities in Ethiopia. *Patient Safety in*  
477 *Surgery*. 2022 Jun 10;16(1).
- 478 [30] Merkinah Mekebo, Tesfaye Gobena, Behailu Hawulte, Dawit Tamiru, Debella A, Yadeta E,  
479 et al. Level of implementation of district health information system 2 at public health facilities in  
480 Eastern Ethiopia. *Digital health*. 2022 Jan 1; 8:205520762211311-205520762211311.
- 481 [31] Operational Research and Coaching for Analysts (ORCA)- participants & team, Adane A,  
482 Adege TM, Ahmed MM, Anteneh HA, et al. Exploring data quality and use of the routine health  
483 information system in Ethiopia: a mixed-methods study. *BMJ Open*. 2021;11(12): e050356.  
484 Published 2021 Dec 23. doi:10.1136/bmjopen-2021-050356
- 485 [32] Endriyas M, Alano A, Mekonnen E, Ayele S, Kelaye T, Shiferaw M, et al. Understanding  
486 performance data: health management information system data accuracy in Southern Nations  
487 Nationalities and People's Region, Ethiopia. *BMC Health Services Research*. 2019 Mar  
488 18;19(1).
- 489 [33] Adane A, Adege TM, Ahmed MM, Anteneh HA, Ayalew ES, Berhanu D, et al. Routine  
490 health management information system data in Ethiopia: consistency, trends, and challenges.  
491 *Global Health Action* [Internet]. [cited 2021 Apr 4];14(1). Available from:  
492 <https://www.ncbi.nlm.nih.gov/pmc/articles/PMC7833046/#:~:text=A%20routine%20Health%20M>  
493 [anagement%20Information](https://www.ncbi.nlm.nih.gov/pmc/articles/PMC7833046/#:~:text=A%20routine%20Health%20M)



- 494 [34] Ugwu-Olisa OA, Chidi EV, Emmanuel EU, Chinedu NG, Onyeyirichi O. Mortality audit in  
495 general surgery unit and lessons learned at a Nigerian tertiary hospital: a single centre  
496 observational study. Pan African Medical Journal. 2022;41.
- 497 [35] Bindroo S, Saraf R. Surgical Mortality Audit-lessons Learned in a Developing Nation. Int  
498 Surg. 2015 Jun;100(6):1026-32.

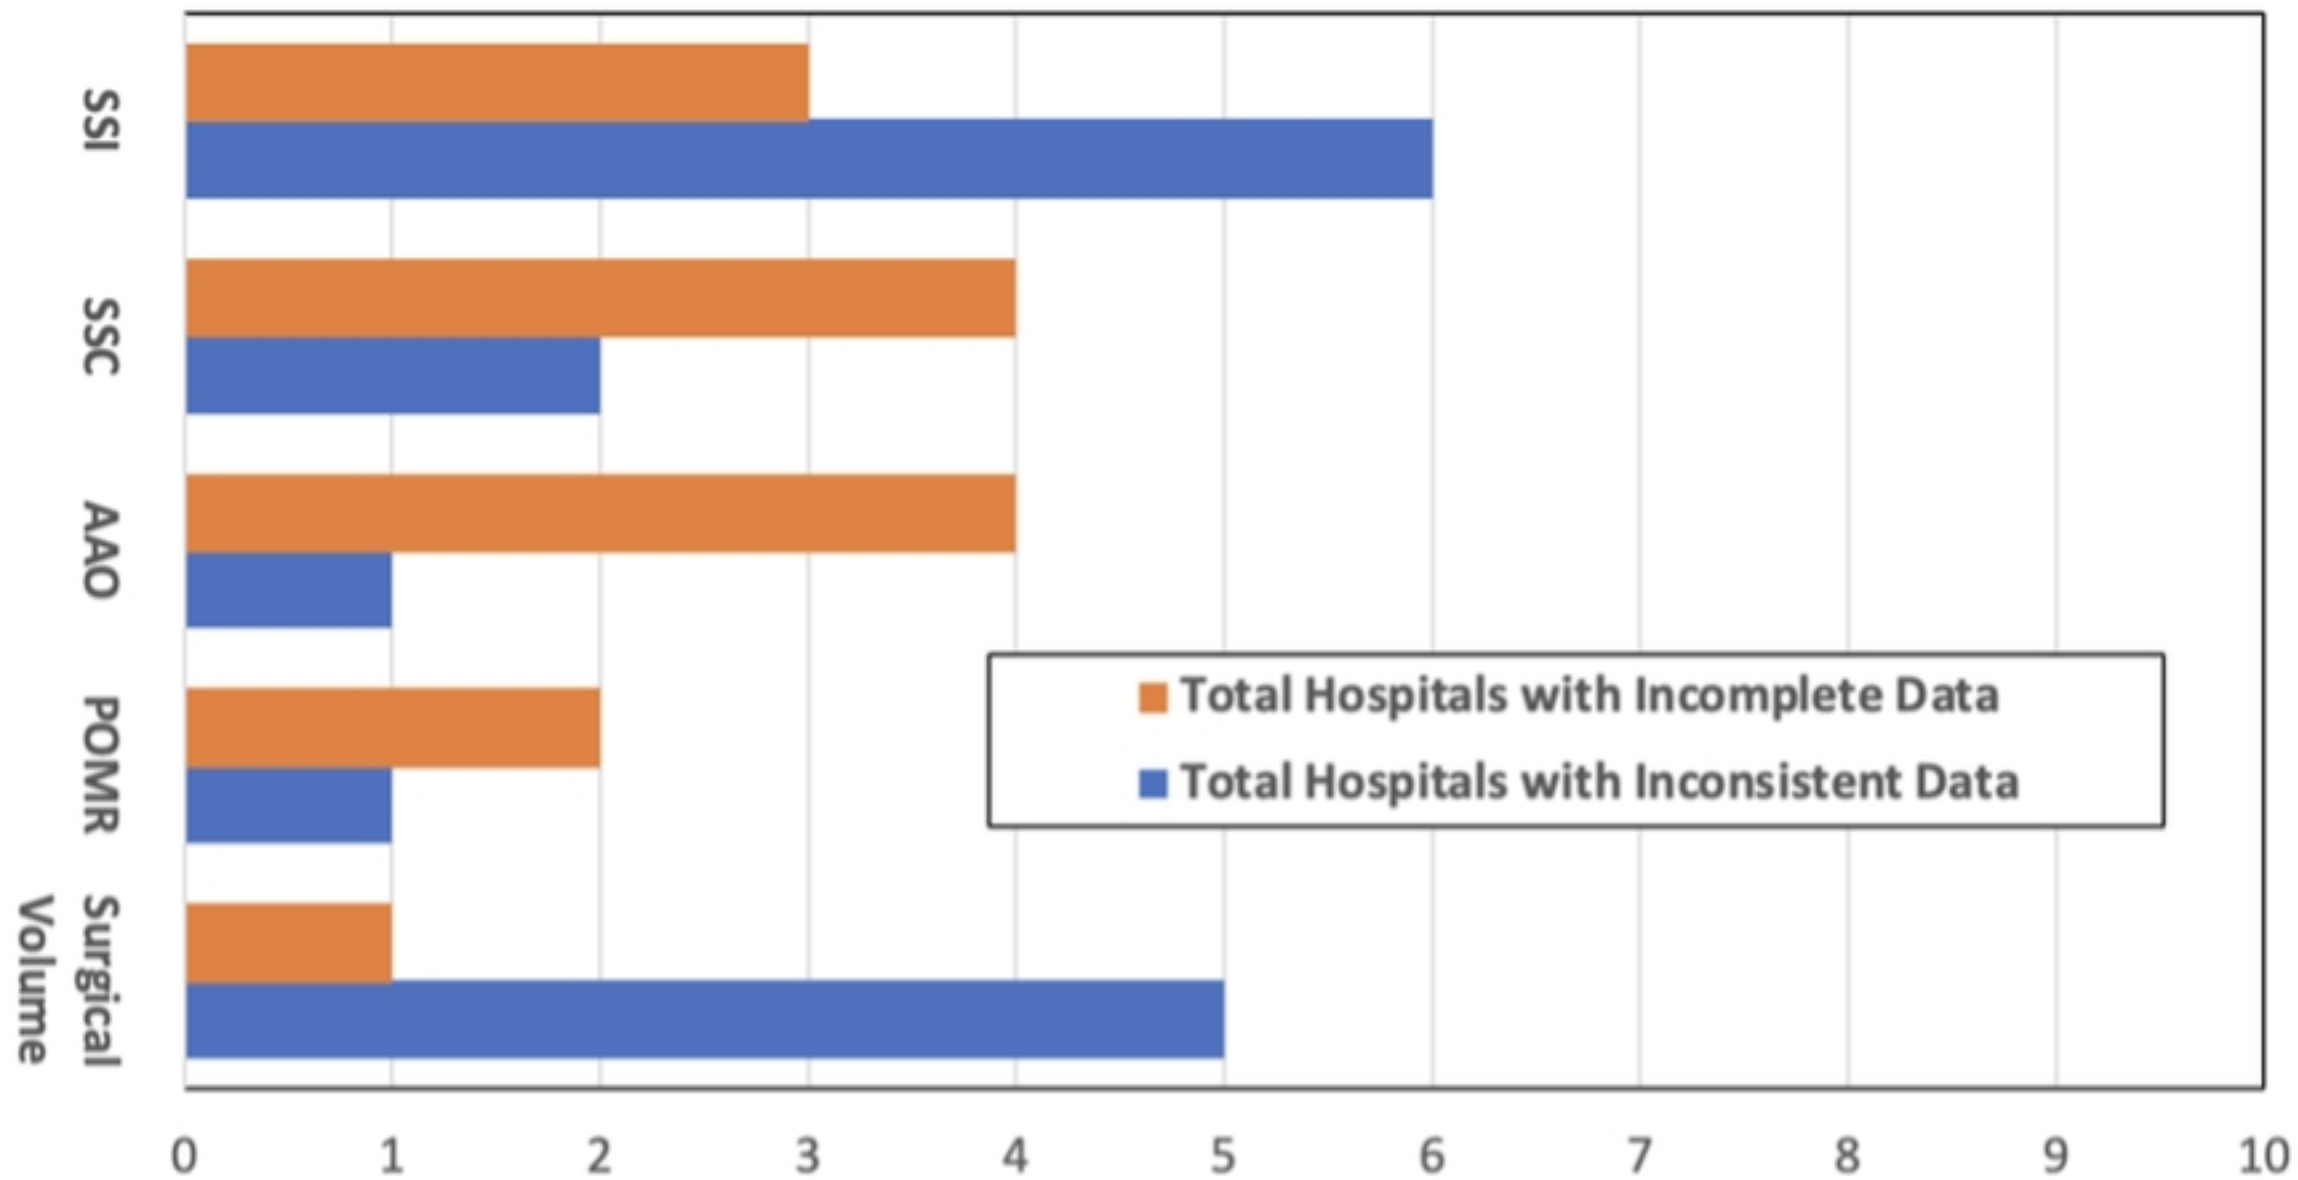

Figure

## SURGICAL INDICATOR DATA FLOW PROCESS

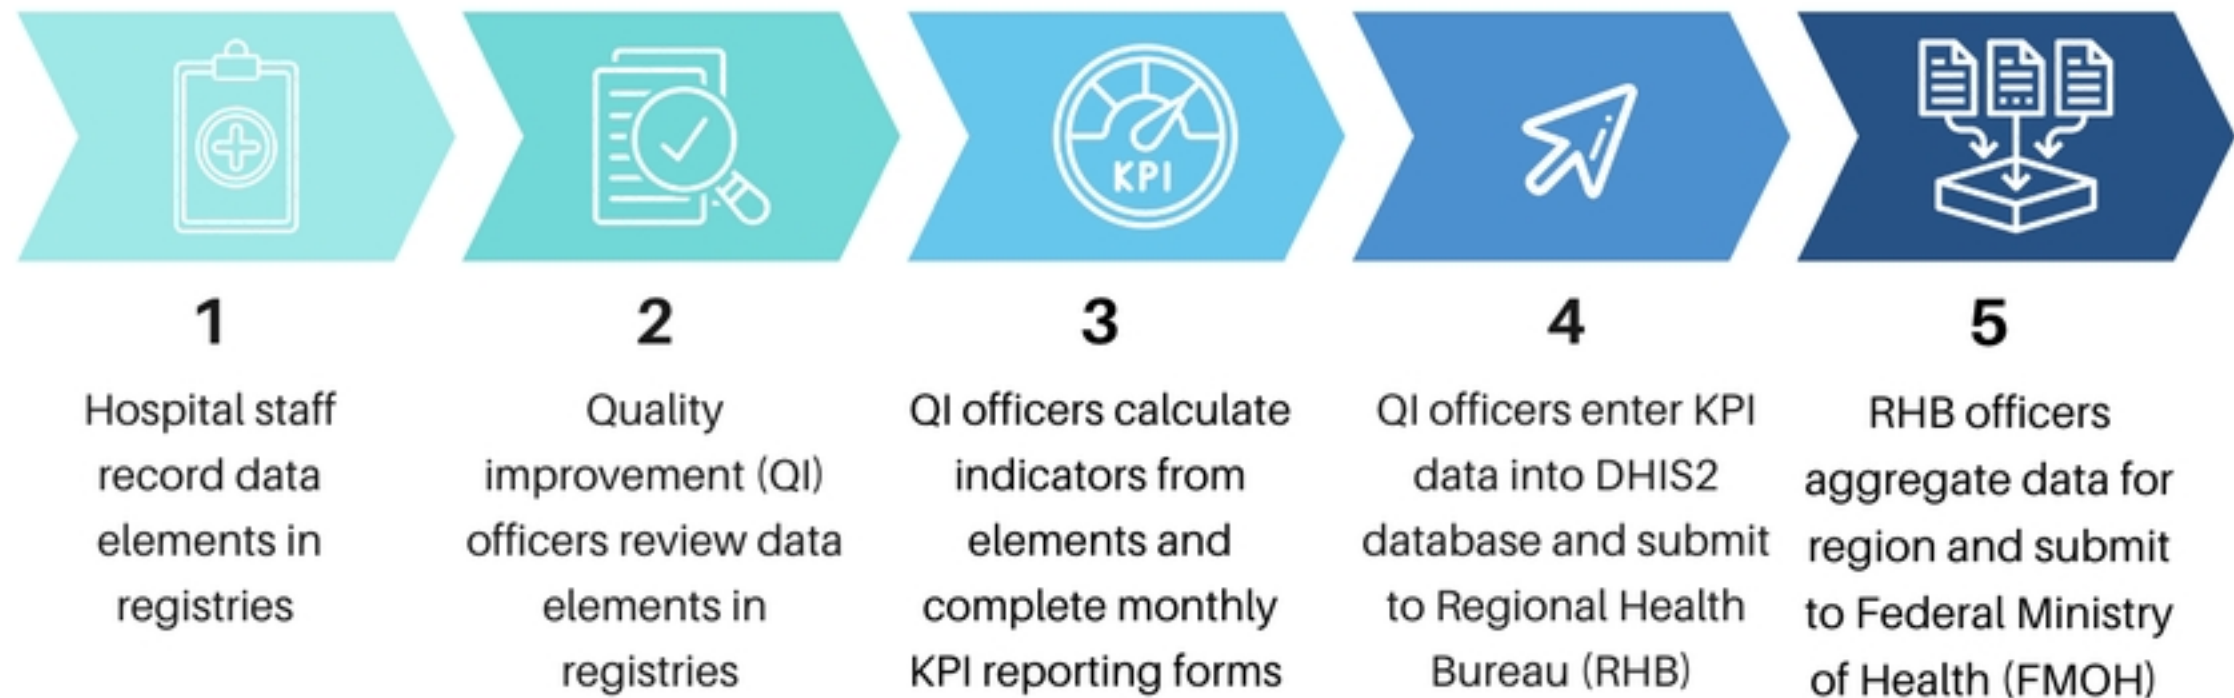

Figure
